# Supplementary material for: Exploration of stem endophytic communities revealed developmental stage as one of the drivers of fungal endophytic community assemblages in two Amazonian hardwood genera
Source: PubMed Central journal article supplement (PMC6722055; doi:10.1038/s41598-019-48943-2), 2019-09-03

**Exploration of stem endophytic communities revealed developmental stage as one of the drivers of fungal endophytic community assemblages in two Amazonian hardwood genera**

Demetra N. Skaltsas\*<sup>1,2</sup>, Fernanda Badotti<sup>3</sup>, Aline Bruna Martins Vaz<sup>4</sup>, Felipe Ferreira da Silva<sup>4</sup>, Romina Gazis<sup>5</sup>, Kenneth Wurdack<sup>6</sup>, Lisa Castlebury<sup>7</sup>, Aristóteles Góes-Neto<sup>3</sup>, Priscila Chaverri<sup>1,8</sup>

<sup>1</sup>University of Maryland, Department of Plant Science and Landscape Architecture, 2112 Plant Sciences Building, College Park, Maryland 20742, USA

<sup>2</sup>U.S. Department of Agriculture, Agricultural Research Service, Mycology and Nematology Genetic Diversity and Biology Laboratory, 10300 Baltimore Avenue, Beltsville, Maryland 20705, USA; Oak Ridge Institute for Science and Education, ARS Research Participation Program, MC-100-44, Oak Ridge, TN 37831, USA

<sup>3</sup>Centro Federal de Educação Tecnológica de Minas Gerais, Departamento de Química, 30421-169, Belo Horizonte, Minas Gerais 30421-169, Brazil

<sup>4</sup>Universidade Federal de Minas Gerais, Departamento de Microbiologia, 31270-901, Belo Horizonte, Minas Gerais 31270-901, Brazil

<sup>5</sup>University of Florida, Department of Plant Pathology, Tropical Research & Education Center, 18905 SW 280 Street, Homestead, Florida 33031, USA

<sup>6</sup>Smithsonian Institution, Department of Botany, National Museum of Natural History, P.O. Box 37012, Washington, District of Columbia 20013, USA

<sup>7</sup>U.S. Department of Agriculture, Agricultural Research Service, Mycology and Nematology Genetic Diversity and Biology Laboratory, 10300 Baltimore Avenue, Beltsville, Maryland 20705, USA

<sup>8</sup>Escuela de Biología, Centro de Investigaciones en Productos Naturales, Universidad de Costa Rica, San Pedro, San José 11501, Costa Rica

**Corresponding author:** Demetra N. Skaltsas, email: demetraskaltsas@gmail.com.

U.S. Department of Agriculture, Agricultural Research Service, Mycology and Nematology Genetic Diversity and Biology Laboratory, 10300 Baltimore Avenue, Beltsville, Maryland 20705, USA

Phone: +1 240 481 9380

## Tables

**Supplementary Table S1** Representative isolates obtained in this study, with their corresponding GenBank accession numbers and function guild assignment.

| OTU No. | Taxonomic assignment              | Representative isolate | GenBank no. | Function guild assignment |
|---------|-----------------------------------|------------------------|-------------|---------------------------|
| 1       | <i>Absidia species 1</i>          | PNB02_2A               | MH267813    | Saprotroph                |
| 2       | <i>Absidia species 2</i>          | PNB13_7C1              | MH267812    | Saprotroph                |
| 3       | <i>Abundisporus species 1</i>     | AMB17_3A               | MH267814    | Wood decay                |
| 4       | <i>Acaromyces species 1</i>       | GPB23_8B               | MH267815    | Entomopathogenic          |
| 5       | <i>Acremoniopsis species 1</i>    | PNB22_1A               | MH267816    | Saprotroph                |
| 6       | <i>Acremonium species 1</i>       | PNB07_7A3              | MH267819    | Fungicolous               |
| 7       | <i>Acremonium species 2</i>       | JMB07_1A1              | MH267817    | Fungicolous               |
| 8       | <i>Acremonium species 3</i>       | PXB21_6B               | MH267818    | Fungicolous               |
| 9       | <i>Acrocalymma species 1</i>      | AHGB04_6B              | MH267820    | Fungicolous               |
| 10      | <i>Acrodictys species 1</i>       | AHGB14_8B              | MH267821    | Saprotroph                |
| 11      | <i>Agaricomycetes species 1</i>   | PNB22_4A               | MH267822    | Undetermined              |
| 12      | <i>Albonectria species 1</i>      | PXB17_6B               | MH267823    | Plant pathogen            |
| 13      | <i>Alloconiothyrium species 1</i> | AMB12_8A               | MH267824    | Saprotroph                |
| 14      | <i>Alternaria species 1</i>       | AHB25_4A               | MH267825    | Plant pathogen            |
| 15      | <i>Annulohyphoxylon species 1</i> | AHB05_1B               | MH267826    | Wood decay                |
| 16      | <i>Annulohyphoxylon species 2</i> | JMB08_7A1              | MH267827    | Wood decay                |
| 17      | <i>Ascomycota species 1</i>       | JMGB06_5A1             | MH267829    | Undetermined              |
| 18      | <i>Ascomycota species 2</i>       | PXB02_1B               | MH267830    | Undetermined              |
| 19      | <i>Ascomycota species 3</i>       | PXB20_6B               | MH267831    | Undetermined              |
| 20      | <i>Aspergillus species 1</i>      | AHB20_9B               | MH267835    | Saprotroph                |
| 21      | <i>Aspergillus species 2</i>      | JHB13_8C               | MH267832    | Saprotroph                |
| 22      | <i>Aspergillus species 3</i>      | AHB20_4B               | MH267840    | Saprotroph                |
| 23      | <i>Aspergillus species 4</i>      | JMB13_2BC              | MH267837    | Saprotroph                |
| 24      | <i>Aspergillus species 5</i>      | JHB08_1A               | MH267833    | Saprotroph                |
| 25      | <i>Aspergillus species 6</i>      | PXB15_2A               | MH267836    | Saprotroph                |
| 26      | <i>Aspergillus species 7</i>      | AHB20_3A               | MH267839    | Saprotroph                |
| 27      | <i>Aspergillus species 8</i>      | PXB18_7A               | MH267834    | Saprotroph                |

| OTU No. | Taxonomic assignment               | Representative isolate | GenBank no. | Function guild assignment |
|---------|------------------------------------|------------------------|-------------|---------------------------|
| 28      | <i>Aspergillus species 9</i>       | AHB10_3A               | MH267838    | Saprotroph                |
| 29      | <i>Beltrania species 1</i>         | GPB03_3B               | MH267841    | Saprotroph                |
| 30      | <i>Beltraniella species 1</i>      | AHGB21_9A1             | MH267843    | Saprotroph                |
| 31      | <i>Beltraniella species 2</i>      | JHGB09_6A              | MH267842    | Saprotroph                |
| 32      | <i>Biatriospora species 2</i>      | PXB15_7A               | MH267844    | Fungicolous               |
| 33      | <i>Bionectriaceae species 1</i>    | AHB01_5B               | MH267846    | Undetermined              |
| 34      | <i>Bionectriaceae species 2</i>    | PXB07_1A               | MH267845    | Undetermined              |
| 35      | <i>Bjerkander species 1</i>        | PXB08_5B               | MH267847    | Wood decay                |
| 36      | <i>Boliniales species 2</i>        | AMB21_6A               | MH267848    | Undetermined              |
| 37      | <i>Botryosphaeriales species 1</i> | JHGB09_1A              | MH267849    | Undetermined              |
| 38      | <i>Calonectria species 1</i>       | JMGB02_4A              | MH267850    | Plant pathogen            |
| 39      | <i>Castanediella species 1</i>     | JHGB10_4A              | MH267851    | Saprotroph                |
| 40      | <i>Castanediella species 2</i>     | JHGB24_6A              | MH267852    | Saprotroph                |
| 41      | <i>Ceriporia species 1</i>         | JHB23_4C1              | MH267854    | Wood decay                |
| 42      | <i>Ceriporia species 2</i>         | AHB01_4A               | MH267853    | Wood decay                |
| 43      | <i>Chaetosphaeriaceae 1</i>        | AHGB16_2A              | MH267855    | Undetermined              |
| 44      | <i>Chloridium species 1</i>        | PXB03_2A               | MH267856    | Wood decay                |
| 45      | <i>Chrysosporthe species 1</i>     | JHGB18_6A              | MH267857    | Plant pathogen            |
| 46      | <i>Cladosporium species 1</i>      | JHB02_4D               | MH267859    | Plant pathogen            |
| 47      | <i>Cladosporium species 2</i>      | JHGB02_6B1A1           | MH267858    | Plant pathogen            |
| 48      | <i>Cladosporium species 3</i>      | JHGB21_1A              | MH267861    | Plant pathogen            |
| 49      | <i>Cladosporium species 4</i>      | AHB17_5A               | MH267860    | Plant pathogen            |
| 50      | <i>Clavicipitaceae species 1</i>   | PNB11_6A               | MH267862    | Entomopathogenic          |
| 51      | <i>Clonostachys species 1</i>      | JMGB02_4B              | MH267864    | Saprotroph                |
| 52      | <i>Clonostachys species 2</i>      | GPB10_3B               | MH267866    | Saprotroph                |
| 53      | <i>Clonostachys species 3</i>      | AHB27_2B               | MH267865    | Saprotroph                |
| 54      | <i>Clonostachys species 4</i>      | PNB12_2A               | MH267863    | Saprotroph                |
| 55      | <i>Colletotrichum species 1</i>    | AMGB14_1B              | MH267868    | Plant pathogen            |
| 56      | <i>Colletotrichum species 10</i>   | AHGB10_3A              | MH267871    | Plant pathogen            |
| 57      | <i>Colletotrichum species 11</i>   | GPB14_2B               | MH267872    | Plant pathogen            |
| 58      | <i>Colletotrichum species 12</i>   | GPB23_1A               | MH267879    | Plant pathogen            |

| OTU No. | Taxonomic assignment               | Representative isolate | GenBank no. | Function guild assignment |
|---------|------------------------------------|------------------------|-------------|---------------------------|
| 59      | <i>Colletotrichum species 13</i>   | AMGB09_6B              | MH267873    | Plant pathogen            |
| 60      | <i>Colletotrichum species 14</i>   | AHGB15_8A              | MH267881    | Plant pathogen            |
| 61      | <i>Colletotrichum species 15</i>   | AHGB04_2B              | MH267870    | Plant pathogen            |
| 62      | <i>Colletotrichum species 16</i>   | AHGB04_8C              | MH267880    | Plant pathogen            |
| 63      | <i>Colletotrichum species 17</i>   | PNB12_3C2              | MH267876    | Plant pathogen            |
| 64      | <i>Colletotrichum species 2</i>    | AMGB17_5A1             | MH267869    | Plant pathogen            |
| 65      | <i>Colletotrichum species 3</i>    | AHGB10_8A              | MH267882    | Plant pathogen            |
| 66      | <i>Colletotrichum species 4</i>    | AMGB19_6A              | MH267875    | Plant pathogen            |
| 67      | <i>Colletotrichum species 5</i>    | AHGB02_7A              | MH267874    | Plant pathogen            |
| 68      | <i>Colletotrichum species 6</i>    | AHGB10_5A              | MH267878    | Plant pathogen            |
| 69      | <i>Colletotrichum species 7</i>    | AHGB19_4B              | MH267883    | Plant pathogen            |
| 70      | <i>Colletotrichum species 8</i>    | AHGB10_5C              | MH267867    | Plant pathogen            |
| 71      | <i>Colletotrichum species 9</i>    | AHGB03_5A              | MH267877    | Plant pathogen            |
| 72      | <i>Conferticium species 1</i>      | AMB14_7B               | MH267884    | Wood decay                |
| 73      | <i>Conoideocrella species 1</i>    | AHB21_4B2              | MH267885    | Entomopathogenic          |
| 74      | <i>Cophinforma species 1</i>       | JHGB09_5A              | MH267886    | Saprotroph                |
| 75      | <i>Coprinellus species 1</i>       | PXB01_5B               | MH267887    | Saprotroph                |
| 76      | <i>Cordyceps species 1</i>         | AHB01_1A               | MH267888    | Entomopathogenic          |
| 77      | <i>Coriolopsis species 1</i>       | AHB04_2A               | MH267889    | Saprotroph                |
| 78      | <i>Corticiales species 1</i>       | JHGB12_7B              | MH267890    | Undetermined              |
| 79      | <i>Corynespora species 1</i>       | AHGB22_6A2             | MH267891    | Plant pathogen            |
| 80      | <i>Cosmospora species 1</i>        | AMB03_3A               | MH267892    | Fungicolous               |
| 81      | <i>Cryphonectriaceae species 1</i> | JHGB17_5B              | MH267893    | Plant pathogen            |
| 82      | <i>Curvularia species 1</i>        | GPB32_9B               | MH267894    | Plant pathogen            |
| 83      | <i>Cylindrium species 1</i>        | PNB29_2B               | MH267895    | Saprotroph                |
| 84      | <i>Cyphellophora species 1</i>     | AHGB32_3B              | MH267896    | Saprotroph                |
| 85      | <i>Daedalea species 1</i>          | JHGB24_6B              | MH267897    | Plant pathogen            |
| 86      | <i>Daldinia species 1</i>          | PXB05_4A               | MH267898    | Saprotroph                |
| 87      | <i>Debaryomyces species 1</i>      | AHB19_9A               | MH267899    | Saprotroph                |
| 88      | <i>Dentocorticium species 1</i>    | JHGB17_2A              | MH267900    | Saprotroph                |
| 89      | <i>Diaporthales species 1</i>      | PXB20_7A               | MH267901    | Undetermined              |

| OTU No. | Taxonomic assignment                | Representative isolate | GenBank no. | Function guild assignment |
|---------|-------------------------------------|------------------------|-------------|---------------------------|
| 90      | <i>Diaporthales species 2</i>       | JHGB13_7A              | MH267902    | Undetermined              |
| 91      | <i>Diaporthe species 1</i>          | JMGB10_5B1             | MH267918    | Plant pathogen            |
| 92      | <i>Diaporthe species 10</i>         | AHGB26_4A              | MH267913    | Plant pathogen            |
| 93      | <i>Diaporthe species 11</i>         | AHGB02_2A              | MH267915    | Plant pathogen            |
| 94      | <i>Diaporthe species 12</i>         | AHGB02_1A              | MH267914    | Plant pathogen            |
| 95      | <i>Diaporthe species 13</i>         | AHGB25_8B              | MH267903    | Plant pathogen            |
| 96      | <i>Diaporthe species 14</i>         | AHGB04_3A              | MH267919    | Plant pathogen            |
| 97      | <i>Diaporthe species 15</i>         | AHB22_6B               | MH267908    | Plant pathogen            |
| 98      | <i>Diaporthe species 16</i>         | AHGB05_1B              | MH267909    | Plant pathogen            |
| 99      | <i>Diaporthe species 17</i>         | GXB18_7A               | MH267906    | Plant pathogen            |
| 100     | <i>Diaporthe species 18</i>         | JHGB06_5A1             | MH267920    | Plant pathogen            |
| 101     | <i>Diaporthe species 2</i>          | GXB11_4A               | MH267916    | Plant pathogen            |
| 102     | <i>Diaporthe species 3</i>          | GPB21_9A               | MH267905    | Plant pathogen            |
| 103     | <i>Diaporthe species 4</i>          | AHGB01_1B              | MH267912    | Plant pathogen            |
| 104     | <i>Diaporthe species 5</i>          | JMGB13_6A              | MH267917    | Plant pathogen            |
| 105     | <i>Diaporthe species 6</i>          | GXB21_9A               | MH267904    | Plant pathogen            |
| 106     | <i>Diaporthe species 7</i>          | JMGB14_3A2             | MH267910    | Plant pathogen            |
| 107     | <i>Diaporthe species 8</i>          | GPB18_1A               | MH267907    | Plant pathogen            |
| 108     | <i>Diaporthe species 9</i>          | JMGB04_6B              | MH267911    | Plant pathogen            |
| 109     | <i>Dothideomycetes species 1</i>    | AHGB13_8A              | MH267923    | Undetermined              |
| 110     | <i>Dothideomycetes species 2</i>    | AHB03_4A               | MH267924    | Undetermined              |
| 111     | <i>Dothideomycetes species 3</i>    | JMB08_8A               | MH267927    | Undetermined              |
| 112     | <i>Dothideomycetes species 4</i>    | PNB05_9B               | MH267922    | Undetermined              |
| 113     | <i>Dothideomycetes species 5</i>    | AMB12_5B               | MH267928    | Undetermined              |
| 114     | <i>Dothideomycetes species 6</i>    | AMB23_9B               | MH267925    | Undetermined              |
| 115     | <i>Dothideomycetes species 7</i>    | JHGB05_3A              | MH267926    | Undetermined              |
| 116     | <i>Dothideomycetes species 8</i>    | AHGB03_6B              | MH267921    | Undetermined              |
| 117     | <i>Endomelanconiopsis species 1</i> | PXB02_3B               | MH267929    | Saprotroph                |
| 118     | <i>Endomelanconiopsis species 2</i> | JHGB09_1B              | MH267931    | Saprotroph                |
| 119     | <i>Endomelanconiopsis species 3</i> | AMB09_5A               | MH267930    | Saprotroph                |
| 120     | <i>Engyodontium species 1</i>       | AMB04_2B2              | MH267932    | Entomopathogenic          |

| OTU No. | Taxonomic assignment                 | Representative isolate | GenBank no. | Function guild assignment |
|---------|--------------------------------------|------------------------|-------------|---------------------------|
| 121     | <i>Entonaema species 1</i>           | AHB18_5B               | MH267934    | Saprotroph                |
| 122     | <i>Entonaema species 2</i>           | JHGB08_1A              | MH267933    | Saprotroph                |
| 123     | <i>Eucasphaeria species 1</i>        | AHB04_5B               | MH267935    | Saprotroph                |
| 124     | <i>Eutypella species 1</i>           | AHGB29_3B              | MH267937    | Plant pathogen            |
| 125     | <i>Eutypella species 2</i>           | JHGB22_6A2             | MH267938    | Plant pathogen            |
| 126     | <i>Eutypella species 3</i>           | PNB18_5A               | MH267936    | Plant pathogen            |
| 127     | <i>Exophiala species 1</i>           | JHB07_7C               | MH267939    | Saprotroph                |
| 128     | <i>Fellomyces species 1</i>          | PNB12_6A               | MH267940    | Fungicolous               |
| 129     | <i>Fusarium species 2</i>            | GPB13_6A2              | MH267946    | Plant pathogen            |
| 130     | <i>Fusarium species 3</i>            | PNB33_2B               | MH267942    | Plant pathogen            |
| 131     | <i>Fusarium species 4</i>            | JMGB04_3A              | MH267943    | Plant pathogen            |
| 132     | <i>Fusarium species 5</i>            | JMGB14_7B              | MH267944    | Plant pathogen            |
| 133     | <i>Fusarium species 6</i>            | GPB25_1B               | MH267941    | Plant pathogen            |
| 134     | <i>Fusarium species 7</i>            | AMB05_2A               | MH267945    | Plant pathogen            |
| 135     | <i>Fusicolla species 1</i>           | PNB01_2A               | MH267947    | Saprotroph                |
| 136     | <i>Ganoderma species 1</i>           | PNB15_5B1              | MH267949    | Plant pathogen            |
| 137     | <i>Ganoderma species 2</i>           | PNB22_7                | MH267948    | Plant pathogen            |
| 138     | <i>Gliomastix species 1</i>          | PXB15_8A               | MH267952    | Saprotroph                |
| 139     | <i>Gliomastix species 2</i>          | AMB07_3A               | MH267950    | Saprotroph                |
| 140     | <i>Gliomastix species 3</i>          | AHB04_1B               | MH267951    | Saprotroph                |
| 141     | <i>Gloeophyllum species 1</i>        | AHGB09_1B1             | MH267953    | Wood decay                |
| 142     | <i>Gongronella species 1</i>         | AMB06_6A               | MH267954    | Saprotroph                |
| 143     | <i>Graphium species 1</i>            | PNB14_9B               | MH267956    | Saprotroph                |
| 144     | <i>Graphium species 2</i>            | AHB20_2A               | MH267955    | Saprotroph                |
| 145     | <i>Gymnopilus species 1</i>          | JHGB16_6A              | MH267957    | Wood decay                |
| 146     | <i>Helotiales species 1</i>          | AHGB12_4B2             | MH267960    | Undetermined              |
| 147     | <i>Helotiales species 2</i>          | JMB06_2C               | MH267961    | Undetermined              |
| 148     | <i>Helotiales species 3</i>          | JMB02_5B               | MH267959    | Undetermined              |
| 149     | <i>Helotiales species 4</i>          | PXB21_8A               | MH267958    | Undetermined              |
| 150     | <i>Herpotrichiellaceae species 1</i> | AMB17_2A               | MH267963    | Undetermined              |
| 151     | <i>Herpotrichiellaceae species 2</i> | JHB02_9B2              | MH267962    | Saprotroph                |

| OTU No. | Taxonomic assignment                 | Representative isolate | GenBank no. | Function guild assignment |
|---------|--------------------------------------|------------------------|-------------|---------------------------|
| 152     | <i>Hortaea species 1</i>             | AHB01_2A3              | MH267964    | Undetermined              |
| 153     | <i>Hyalocladosporiella species 1</i> | AMB23_2A               | MH267965    | Plant pathogen            |
| 154     | <i>Hyaloscypha species 1</i>         | JHB05_5B               | MH267966    | Wood decay                |
| 155     | <i>Hymenochaete species 1</i>        | PXB08_5A               | MH267967    | Wood decay                |
| 156     | <i>Hyphodontia species 1</i>         | PNB27_5A               | MH267968    | Wood decay                |
| 157     | <i>Hypocreaceae species 1</i>        | AMB03_4A               | MH267969    | Undetermined              |
| 158     | <i>Hypocreales species 1</i>         | PXB10_3B               | MH267970    | Undetermined              |
| 159     | <i>Hypocreales species 2</i>         | JHB13_6B               | MH267973    | Undetermined              |
| 160     | <i>Hypocreales species 4</i>         | AHB02_1A               | MH267972    | Undetermined              |
| 161     | <i>Hypocreales species 5</i>         | PXB19_7B               | MH267971    | Undetermined              |
| 162     | <i>Hypoxyton species 1</i>           | PNB11_8C               | MH267974    | Saprotroph                |
| 163     | <i>Infundibulomyces species 1</i>    | JHGB24_7A              | MH267975    | Saprotroph                |
| 164     | <i>Irpex species 1</i>               | JMGB02_5A              | MH267976    | Wood decay                |
| 165     | <i>Isaria species 1</i>              | PXB03_9A               | MH267977    | Entomopathogenic          |
| 166     | <i>Jattaea species 1</i>             | AMB05_9A2A             | MH267978    | Wood decay                |
| 167     | <i>Kirschsteiniothelia species 1</i> | AHGB13_8B              | MH267979    | Saprotroph                |
| 168     | <i>Kirschsteiniothelia species 2</i> | PNB24_8B               | MH267980    | Saprotroph                |
| 169     | <i>Kretzschmaria species 1</i>       | PNB08_9C1              | MH267981    | Wood decay                |
| 170     | <i>Lachnum species 1</i>             | JHB02_3A2              | MH267982    | Saprotroph                |
| 171     | <i>Lasiodiplodia species 1</i>       | PXB05_3A               | MH267984    | Plant pathogen            |
| 172     | <i>Lasiodiplodia species 2</i>       | AMB14_1A               | MH267983    | Plant pathogen            |
| 173     | <i>Lecanicillium species 1</i>       | JMB06_8B               | MH267985    | Entomopathogenic          |
| 174     | <i>Leptodiscella species 1</i>       | PNB23_8C               | MH267986    | Saprotroph                |
| 175     | <i>Letendreaa species 1</i>          | PNB05_3A               | MH267987    | Saprotroph                |
| 176     | <i>Lophiostoma species 1</i>         | PNB31_2A               | MH267988    | Saprotroph                |
| 177     | <i>Lophiostoma species 2</i>         | PXB22_4C2              | MH267989    | Saprotroph                |
| 178     | <i>Magnaporthaceae species 1</i>     | AHGB19_4BC             | MH267991    | Undetermined              |
| 179     | <i>Magnaporthaceae species 2</i>     | AHGB25_2A              | MH267990    | Undetermined              |
| 180     | <i>Marasmiellus species 1</i>        | JHGB06_2A              | MH267992    | Plant pathogen            |
| 181     | <i>Metapochonia species 1</i>        | JHB10_4A               | MH267994    | Entomopathogenic          |
| 182     | <i>Metapochonia species 2</i>        | AHB21_6A               | MH267993    | Entomopathogenic          |

| OTU No. | Taxonomic assignment               | Representative isolate | GenBank no. | Function guild assignment |
|---------|------------------------------------|------------------------|-------------|---------------------------|
| 183     | <i>Mucorales species 1</i>         | PXB11_6A               | MH267995    | Undetermined              |
| 184     | <i>Mucorales species 2</i>         | PNB07_6A               | MH267996    | Undetermined              |
| 185     | <i>Muscodor species 1</i>          | JMGB05_7B              | MH267998    | Fungicolous               |
| 186     | <i>Muscodor species 2</i>          | AMGB23_6A              | MH267997    | Fungicolous               |
| 187     | <i>Muscodor species 3</i>          | AHGB10_2B              | MH267999    | Fungicolous               |
| 188     | <i>Mycena species 1</i>            | AHB15_9A1              | MH268000    | Saprotroph                |
| 189     | <i>Mycoleptodiscus species 1</i>   | JHGB12_8A              | MH268001    | Plant pathogen            |
| 190     | <i>Myrothecium species 1</i>       | AHGB03_4A              | MH268002    | Plant pathogen            |
| 191     | <i>Nectria species 1</i>           | AHB02_4A               | MH268003    | Plant pathogen            |
| 192     | <i>Nectriaceae species 1</i>       | AHB12_1C               | MH268004    | Undetermined              |
| 193     | <i>Nemania species 1</i>           | PXB16_9B               | MH268005    | Saprotroph                |
| 194     | <i>Nemania species 2</i>           | JHGB07_5B              | MH268006    | Saprotroph                |
| 195     | <i>Nemania species 3</i>           | JMGB03_2A              | MH268007    | Saprotroph                |
| 196     | <i>Nemania species 5</i>           | AMGB24_8A              | MH268008    | Saprotroph                |
| 197     | <i>Nemania species 6</i>           | AHGB23_4A              | MH268009    | Saprotroph                |
| 198     | <i>Neocosmospora species 1</i>     | AMB09_3B               | MH268010    | Fungicolous               |
| 199     | <i>Neopestalotiopsis species 1</i> | PNB24_5A               | MH268011    | Plant pathogen            |
| 200     | <i>Neopestalotiopsis species 2</i> | JHB09_8A               | MH268012    | Plant pathogen            |
| 201     | <i>Neopestalotiopsis species 3</i> | AHB12_8B               | MH268013    | Plant pathogen            |
| 202     | <i>Oidiodendron species 1</i>      | JMB08_5A               | MH268014    | Saprotroph                |
| 203     | <i>Oxydothis species 1</i>         | JHGB17_3A              | MH268015    | Saprotroph                |
| 204     | <i>Paecilomyces species 1</i>      | PNB19_2A1              | MH268016    | Entomopathogenic          |
| 205     | <i>Paraconiothyrium species 1</i>  | PXB09_4A               | MH268017    | Fungicolous               |
| 206     | <i>Paraconiothyrium species 2</i>  | JMB01_2B               | MH268019    | Fungicolous               |
| 207     | <i>Paraconiothyrium species 3</i>  | PNB10_6A               | MH268020    | Fungicolous               |
| 208     | <i>Paraconiothyrium species 4</i>  | PNB15_1B1              | MH268018    | Fungicolous               |
| 209     | <i>Paramyrothecium species 1</i>   | AHGB09_6A1             | MH268021    | Plant pathogen            |
| 210     | <i>Paraphaeosphaeria species 1</i> | AHB05_2A               | MH268022    | Saprotroph                |
| 211     | <i>Penicillium species 1</i>       | PNB11_7A               | MH268031    | Saprotroph                |
| 212     | <i>Penicillium species 10</i>      | AMB16_2A               | MH268035    | Saprotroph                |
| 213     | <i>Penicillium species 11</i>      | AHB02_6B               | MH268023    | Saprotroph                |



| OTU No. | Taxonomic assignment              | Representative isolate | GenBank no. | Function guild assignment |
|---------|-----------------------------------|------------------------|-------------|---------------------------|
| 214     | <i>Penicillium species 12</i>     | JHB22_8A               | MH268024    | Saprotroph                |
| 215     | <i>Penicillium species 13</i>     | PNB19_6A1              | MH268037    | Saprotroph                |
| 216     | <i>Penicillium species 14</i>     | PNB05_1B               | MH268038    | Saprotroph                |
| 217     | <i>Penicillium species 15</i>     | PNB11_5B               | MH268033    | Saprotroph                |
| 218     | <i>Penicillium species 16</i>     | JHB06_3D1              | MH268040    | Saprotroph                |
| 219     | <i>Penicillium species 17</i>     | PNB13_9A               | MH268026    | Saprotroph                |
| 220     | <i>Penicillium species 18</i>     | PNB01_1B               | MH268028    | Saprotroph                |
| 221     | <i>Penicillium species 2</i>      | PNB18_6A1              | MH268025    | Saprotroph                |
| 222     | <i>Penicillium species 3</i>      | PNB11_4A               | MH268030    | Saprotroph                |
| 223     | <i>Penicillium species 4</i>      | PNB24_1B               | MH268029    | Saprotroph                |
| 224     | <i>Penicillium species 5</i>      | AMB04_1A               | MH268034    | Saprotroph                |
| 225     | <i>Penicillium species 6</i>      | PXB17_9B               | MH268032    | Saprotroph                |
| 226     | <i>Penicillium species 7</i>      | AHB27_1AB              | MH268036    | Saprotroph                |
| 227     | <i>Penicillium species 8</i>      | PXB06_8A               | MH268039    | Saprotroph                |
| 228     | <i>Penicillium species 9</i>      | PXB13_3A               | MH268027    | Saprotroph                |
| 229     | <i>Peniophora species 1</i>       | AMB03_1A               | MH268042    | Wood decay                |
| 230     | <i>Peniophora species 2</i>       | GPB11_7D               | MH268041    | Wood decay                |
| 231     | <i>Pestalotiopsis species 1</i>   | JMB08_3B2              | MH268043    | Plant pathogen            |
| 232     | <i>Pezicula species 1</i>         | PXB14_1B               | MH268045    | Plant pathogen            |
| 233     | <i>Pezicula species 2</i>         | AHGB23_2A2             | MH268046    | Plant pathogen            |
| 234     | <i>Pezicula species 3</i>         | AMGB06_5B              | MH268044    | Plant pathogen            |
| 235     | <i>Phaeoacremonium species 1</i>  | AMB18_8B2              | MH268047    | Plant pathogen            |
| 236     | <i>Phaeoacremonium species 2</i>  | AHB24_3A               | MH268048    | Plant pathogen            |
| 237     | <i>Phaeophlebiopsis species 1</i> | JHGB25_4A              | MH268049    | Saprotroph                |
| 238     | <i>Phanerochaete species 1</i>    | PXB08_9B               | MH268050    | Wood decay                |
| 239     | <i>Phanerochaete species 2</i>    | AMB21_5A               | MH268051    | Wood decay                |
| 240     | <i>Phialea species 1</i>          | AMB18_3A               | MH268052    | Saprotroph                |
| 241     | <i>Phialemoniopsis species 1</i>  | PNB33_3A               | MH268053    | Saprotroph                |
| 242     | <i>Phialemoniopsis species 2</i>  | PXB05_5A               | MH268054    | Saprotroph                |
| 243     | <i>Phialocephala species 1</i>    | AHB14_9A1A             | MH268055    | Saprotroph                |
| 244     | <i>Phialocephala species 2</i>    | AMB14_7A               | MH268056    | Saprotroph                |

| OTU No. | Taxonomic assignment                  | Representative isolate | GenBank no. | Function guild assignment |
|---------|---------------------------------------|------------------------|-------------|---------------------------|
| 245     | <i>Phlebia species 1</i>              | AMB20_4A               | MH268057    | Wood decay                |
| 246     | <i>Phlebiopsis species 1</i>          | JHGB12_6B              | MH268059    | Saprotroph                |
| 247     | <i>Phlebiopsis species 2</i>          | JHB09_6B               | MH268058    | Saprotroph                |
| 248     | <i>Phyllosticta species 1</i>         | AHGB01_6A              | MH268060    | Plant pathogen            |
| 249     | <i>Phyllosticta species 2</i>         | AHGB12_5A              | MH268062    | Plant pathogen            |
| 250     | <i>Phyllosticta species 3</i>         | JHGB13_8A              | MH268061    | Plant pathogen            |
| 251     | <i>Physisporinus species 1</i>        | AHB01_7B               | MH268063    | Wood decay                |
| 252     | <i>Pleosporales species 1</i>         | JMGB08_3A1             | MH268065    | Undetermined              |
| 253     | <i>Pleosporales species 2</i>         | JMB15_9B               | MH268067    | Undetermined              |
| 254     | <i>Pleosporales species 3</i>         | AMB08_2B               | MH268066    | Undetermined              |
| 255     | <i>Pleosporales species 4</i>         | AHB18_9B               | MH268068    | Undetermined              |
| 256     | <i>Pleosporales species 5</i>         | AHB11_2A1A             | MH268064    | Undetermined              |
| 257     | <i>Pleurostoma species 1</i>          | AMB01_6A               | MH268069    | Saprotroph                |
| 258     | <i>Polyporales species 1</i>          | PXB17_2A               | MH268071    | Undetermined              |
| 259     | <i>Polyporales species 2</i>          | PNB28_5A               | MH268070    | Undetermined              |
| 260     | <i>Pseudallescheria species 1</i>     | JMB10_5B               | MH268072    | Saprotroph                |
| 261     | <i>Pseudofusicoccum species 1</i>     | AHGB12_2B              | MH268073    | Plant pathogen            |
| 262     | <i>Pseudopestalotiopsis species 1</i> | GPB03_6B               | MH268074    | Plant pathogen            |
| 263     | <i>Psilocybe species 1</i>            | AHB13_3A1              | MH268075    | Saprotroph                |
| 264     | <i>Purpureocillium species 1</i>      | PXB04_1B               | MH268076    | Entomopathogenic          |
| 265     | <i>Purpureocillium species 2</i>      | AHB10_9A               | MH268077    | Entomopathogenic          |
| 266     | <i>Pyrenochaetopsis species 1</i>     | AHB10_7A               | MH268078    | Saprotroph                |
| 267     | <i>Rigidoporus species 1</i>          | AHGB17_3B              | MH268079    | Wood decay                |
| 268     | <i>Rousoella species 1</i>            | PNB08_6A               | MH268080    | Saprotroph                |
| 269     | <i>Thyridariaceae species 1</i>       | PNB16_5A1              | MH268117    | Saprotroph                |
| 270     | <i>Thyridariaceae species 2</i>       | PXB15_4B               | MH268115    | Saprotroph                |
| 271     | <i>Thyridariaceae species 3</i>       | AHB24_2B               | MH268116    | Saprotroph                |
| 272     | <i>Sarocladium species 1</i>          | AHB01_8B               | MH268081    | Saprotroph                |
| 273     | <i>Schizophyllum species 1</i>        | AHGB05_6A              | MH268082    | Wood decay                |
| 274     | <i>Scopuloides species 1</i>          | PNB08_8A2              | MH268083    | Wood decay                |
| 275     | <i>Scytalidium species 1</i>          | PXB08_9A               | MH268084    | Fungicolous               |

| OTU No. | Taxonomic assignment              | Representative isolate | GenBank no. | Function guild assignment |
|---------|-----------------------------------|------------------------|-------------|---------------------------|
| 276     | <i>Scytalidium species 2</i>      | AMB15_1A               | MH268086    | Fungicolous               |
| 277     | <i>Scytalidium species 3</i>      | JHB14_8A               | MH268087    | Fungicolous               |
| 278     | <i>Scytalidium species 4</i>      | PNB27_4C_1             | MH268085    | Fungicolous               |
| 279     | <i>Septobasidium species 1</i>    | PNB30_8B               | MH268088    | Entomopathogenic          |
| 280     | <i>Sistotrema species 1</i>       | AHGB05_5B              | MH268090    | Mycorrhizal               |
| 281     | <i>Sistotrema species 2</i>       | PNB21_8                | MH268089    | Mycorrhizal               |
| 282     | <i>Sistotremastrum species 1</i>  | AHB20_7A2              | MH268091    | Saprotroph                |
| 283     | <i>Sordariales species 1</i>      | JHGB25_5B              | MH268093    | Undetermined              |
| 284     | <i>Sordariales species 2</i>      | JMGB03_6B1             | MH268092    | Undetermined              |
| 285     | <i>Sordariomycetes species 1</i>  | JHGB15_7B              | MH268098    | Undetermined              |
| 286     | <i>Sordariomycetes species 10</i> | JHB04_2A               | MH268099    | Undetermined              |
| 287     | <i>Sordariomycetes species 2</i>  | JHGB16_1A              | MH268095    | Undetermined              |
| 288     | <i>Sordariomycetes species 3</i>  | JHGB02_5B              | MH268096    | Undetermined              |
| 289     | <i>Sordariomycetes species 5</i>  | JHGB10_2A              | MH268094    | Undetermined              |
| 290     | <i>Sordariomycetes species 6</i>  | JHGB06_3B              | MH268097    | Undetermined              |
| 291     | <i>Sphaeronaemella species 1</i>  | PXB04_2B               | MH268102    | Saprotroph                |
| 292     | <i>Stachybotryaceae species 1</i> | AHB27_4F               | MH268103    | Undetermined              |
| 293     | <i>Stereum species 1</i>          | AMB05_6B               | MH268105    | Saprotroph                |
| 294     | <i>Stereum species 2</i>          | JHGB02_3A              | MH268104    | Saprotroph                |
| 295     | <i>Talaromyces species 1</i>      | PNB11_5A1              | MH268107    | Saprotroph                |
| 296     | <i>Talaromyces species 2</i>      | PNB17_5A2              | MH268108    | Saprotroph                |
| 297     | <i>Talaromyces species 3</i>      | PXB20_3A               | MH268106    | Saprotroph                |
| 298     | <i>Talaromyces species 4</i>      | AHB30_8A               | MH268112    | Saprotroph                |
| 299     | <i>Talaromyces species 5</i>      | JHB10_8A               | MH268110    | Saprotroph                |
| 300     | <i>Talaromyces species 6</i>      | PXB08_8A               | MH268109    | Saprotroph                |
| 301     | <i>Talaromyces species 7</i>      | AHB27_4G               | MH268111    | Saprotroph                |
| 302     | <i>Thozetella species 1</i>       | JMGB15_5A              | MH268114    | Saprotroph                |
| 303     | <i>Thozetella species 2</i>       | JMGB06_7A1             | MH268113    | Saprotroph                |
| 304     | <i>Tinctoporellus species 1</i>   | PNB27_6A               | MH268119    | Wood decay                |
| 305     | <i>Tinctoporellus species 2</i>   | JHGB01_1A              | MH268118    | Wood decay                |
| 306     | <i>Tolypocladium species 1</i>    | PNB01_1A1              | MH268121    | Entomopathogenic          |

| OTU No. | Taxonomic assignment                 | Representative isolate | GenBank no. | Function guild assignment |
|---------|--------------------------------------|------------------------|-------------|---------------------------|
| 307     | <i>Tolyposcladium species 2</i>      | AHB21_5B               | MH268123    | Entomopathogenic          |
| 308     | <i>Tolyposcladium species 3</i>      | PNB17_7A1              | MH268124    | Entomopathogenic          |
| 309     | <i>Tolyposcladium species 4</i>      | AHB13_7A               | MH268122    | Entomopathogenic          |
| 310     | <i>Tolyposcladium species 5</i>      | JHB08_3B               | MH268120    | Entomopathogenic          |
| 311     | <i>Trametes species 1</i>            | AHB23_1A               | MH268125    | Wood decay                |
| 312     | <i>Trematosphaeriaceae species 1</i> | AHGB26_2B              | MH268126    | Undetermined              |
| 313     | <i>Tremellales species 1</i>         | PNB09_9A               | MH268127    | Undetermined              |
| 314     | <i>Trichocomaceae species 1</i>      | PNB28_4A               | MH268128    | Saprotroph                |
| 315     | <i>Trichoderma species 1</i>         | AMB08_8B               | MH268131    | Fungicolous               |
| 316     | <i>Trichoderma species 10</i>        | PXB02_8B               | MH268140    | Fungicolous               |
| 317     | <i>Trichoderma species 11</i>        | AHB02_2A               | MH268151    | Fungicolous               |
| 318     | <i>Trichoderma species 12</i>        | AHB14_3B               | MH268132    | Fungicolous               |
| 319     | <i>Trichoderma species 13</i>        | PNB09_5A               | MH268139    | Fungicolous               |
| 320     | <i>Trichoderma species 15</i>        | PXB01_8B               | MH268142    | Fungicolous               |
| 321     | <i>Trichoderma species 16</i>        | PNB03_2A               | MH268138    | Fungicolous               |
| 322     | <i>Trichoderma species 17</i>        | PXB09_9B               | MH268135    | Fungicolous               |
| 323     | <i>Trichoderma species 18</i>        | AMB08_2A               | MH268136    | Fungicolous               |
| 324     | <i>Trichoderma species 19</i>        | PNB14_8A               | MH268149    | Fungicolous               |
| 325     | <i>Trichoderma species 2</i>         | AHB15_1A               | MH268143    | Fungicolous               |
| 326     | <i>Trichoderma species 20</i>        | AMB22_3A1A             | MH268133    | Fungicolous               |
| 327     | <i>Trichoderma species 21</i>        | AHB03_3A               | MH268148    | Fungicolous               |
| 328     | <i>Trichoderma species 22</i>        | PXB06_1A               | MH268137    | Fungicolous               |
| 329     | <i>Trichoderma species 23</i>        | AHB05_3B2              | MH268134    | Fungicolous               |
| 330     | <i>Trichoderma species 24</i>        | AMB11_7A               | MH268130    | Fungicolous               |
| 331     | <i>Trichoderma species 3</i>         | PNB10_7A2              | MH268150    | Fungicolous               |
| 332     | <i>Trichoderma species 4</i>         | PNB15_6B               | MH268147    | Fungicolous               |
| 333     | <i>Trichoderma species 5</i>         | JHB08_2A               | MH268144    | Fungicolous               |
| 334     | <i>Trichoderma species 6</i>         | PNB12_1A1              | MH268141    | Fungicolous               |
| 335     | <i>Trichoderma species 7</i>         | AMB17_6A               | MH268145    | Fungicolous               |
| 336     | <i>Trichoderma species 8</i>         | JMB03_8B               | MH268146    | Fungicolous               |
| 337     | <i>Trichoderma species 9</i>         | AHB24_4B               | MH268129    | Fungicolous               |

| OTU No. | Taxonomic assignment             | Representative isolate | GenBank no. | Function guild assignment |
|---------|----------------------------------|------------------------|-------------|---------------------------|
| 338     | <i>Umbelopsis species 1</i>      | AHB27_3F2              | MH268152    | Saprotroph                |
| 339     | <i>Verticillium species 1</i>    | PXB21_4A               | MH268153    | Nematicidal               |
| 340     | <i>Virgaria species 1</i>        | PNB13_4A1              | MH268154    | Saprotroph                |
| 341     | <i>Wardomyces species 1</i>      | AHB16_5A               | MH268155    | Saprotroph                |
| 342     | <i>Xenoacremonium species 1</i>  | AHB27_3B               | MH268156    | Saprotroph                |
| 343     | <i>Xylaria species 1</i>         | JMGB05_9B              | MH268157    | Saprotroph                |
| 344     | <i>Xylaria species 4</i>         | GPB18_4A               | MH268158    | Saprotroph                |
| 345     | <i>Xylaria species 5</i>         | PXB08_4A               | MH268162    | Saprotroph                |
| 346     | <i>Xylaria species 6</i>         | JHGB20_9               | MH268161    | Saprotroph                |
| 347     | <i>Xylaria species 7</i>         | AHGB04_1A              | MH268159    | Saprotroph                |
| 348     | <i>Xylaria species 8</i>         | GPB06_4C               | MH268160    | Saprotroph                |
| 349     | <i>Xylariaceae species 1</i>     | PXB19_5A               | MH268163    | Saprotroph                |
| 350     | <i>Anungitea species 1</i>       | JHGB05_3B              | MH267828    | Undetermined              |
| 351     | <i>Xylariales species 2</i>      | PNB02_6D               | MH268164    | Undetermined              |
| 352     | <i>Sordariomycetes species 4</i> | PNB10_2A               | MH268100    | Undetermined              |
| 353     | <i>Sordariomycetes species 7</i> | JHGB23_7B              | MH268101    | Undetermined              |
| 354     | <i>Xylomelasma species 1</i>     | AMB02_6A               | MH268165    | Undetermined              |
| 355     | <i>Xylona species 1</i>          | PNB16_8B               | MH268166    | Undetermined              |
| 356     | <i>Zasmidium species 1</i>       | AHB32_8A               | MH268167    | Saprotroph                |

**Supplementary Table S2** Culture-dependent method: Observed and estimated species richness (SR) and diversity (Shannon Hill numbers and Simpson Hill numbers), including upper (UCL) and lower (LCL) confidence intervals, of endophytes per location (Amazon Conservatory for Tropical Studies Biological Station [NAPO], Allpahuayo-Mishana National Reserve [ALPE], and Jenaro Herrera Research Center [JEHE]), tree species and tree developmental stage. Non-overlapping confidence levels signify a significant difference in richness or diversity, while partially overlapping confidence levels do not guarantee non-significance (Chao et al. 2014).

| Site                | Tree species           | Dev. stage | Observed |         |     |     |         |     |     | Estimated |     |     |         |     |     |         |     |     |
|---------------------|------------------------|------------|----------|---------|-----|-----|---------|-----|-----|-----------|-----|-----|---------|-----|-----|---------|-----|-----|
|                     |                        |            | SR       | Shannon | LCL | UCL | Simpson | LCL | UCL | SR        | LCL | UCL | Shannon | LCL | UCL | Simpson | LCL | UCL |
| ALPE                | <i>H. guianensis</i>   | Adult      | 39       | 29      | 20  | 38  | 20      | 12  | 27  | 168       | 77  | 480 | 70      | 29  | 113 | 27      | 20  | 44  |
|                     |                        | Seedling   | 43       | 15      | 11  | 19  | 6       | 4   | 8   | 91        | 59  | 183 | 19      | 15  | 25  | 6       | 6   | 8   |
|                     | <i>H. pauciflora</i>   | Adult      | 44       | 32      | 26  | 38  | 22      | 15  | 30  | 132       | 74  | 301 | 66      | 33  | 100 | 31      | 22  | 45  |
|                     |                        | Seedling   | 39       | 16      | 11  | 21  | 8       | 6   | 10  | 206       | 80  | 715 | 27      | 16  | 39  | 9       | 8   | 12  |
|                     | <i>M. elata</i>        | Adult      | 53       | 39      | 30  | 49  | 26      | 19  | 33  | 138       | 89  | 256 | 82      | 54  | 110 | 36      | 26  | 52  |
|                     |                        | Seedling   | 23       | 17      | 11  | 23  | 13      | 9   | 17  | 119       | 39  | 597 | 33      | 17  | 53  | 16      | 13  | 23  |
| <i>M. spruceana</i> | Adult                  | 32         | 22       | 14      | 31  | 15  | 10      | 21  | 102 | 53        | 259 | 53  | 22      | 90  | 21  | 15      | 35  |     |
|                     | Seedling               | 19         | 8        | 6       | 11  | 4   | 2       | 6   | 43  | 25        | 118 | 12  | 8       | 18  | 4   | 4       | 6   |     |
| JEHE                | <i>H. brasiliensis</i> | Adult      | 28       | 23      | 18  | 28  | 19      | 15  | 24  | 46        | 33  | 87  | 38      | 27  | 49  | 30      | 19  | 43  |
|                     |                        | Seedling   | 57       | 38      | 30  | 47  | 23      | 15  | 31  | 124       | 84  | 225 | 64      | 45  | 83  | 28      | 23  | 39  |
|                     | <i>H. nitida</i>       | Adult      | 17       | 13      | 7   | 18  | 9       | 4   | 15  | 40        | 23  | 114 | 25      | 13  | 42  | 13      | 9   | 24  |
|                     |                        | Seedling   | 40       | 25      | 20  | 30  | 15      | 10  | 20  | 62        | 48  | 101 | 36      | 27  | 45  | 17      | 15  | 24  |
|                     | <i>M. spruceana</i>    | Adult      | 39       | 23      | 14  | 32  | 12      | 6   | 18  | 197       | 86  | 572 | 58      | 23  | 103 | 14      | 12  | 22  |
|                     |                        | Seedling   | 45       | 19      | 15  | 23  | 9       | 7   | 11  | 56        | 49  | 80  | 23      | 19  | 28  | 9       | 9   | 12  |
| NAPO                | <i>H. guianensis</i>   | Adult      | 90       | 55      | 45  | 64  | 32      | 25  | 38  | 218       | 150 | 359 | 93      | 72  | 114 | 37      | 32  | 48  |
|                     |                        | Seedling   | 35       | 12      | 10  | 15  | 6       | 5   | 7   | 51        | 40  | 89  | 14      | 12  | 17  | 6       | 6   | 8   |
|                     | <i>H. nitida</i>       | Adult      | 43       | 35      | 25  | 46  | 26      | 14  | 37  | 170       | 88  | 400 | 117     | 38  | 197 | 46      | 26  | 84  |
|                     |                        | Seedling   | 19       | 10      | 7   | 14  | 7       | 5   | 9   | 49        | 25  | 162 | 15      | 10  | 22  | 7       | 7   | 10  |
|                     | <i>M. spruceana</i>    | Adult      | 79       | 67      | 55  | 79  | 54      | 42  | 66  | 292       | 175 | 550 | 192     | 119 | 265 | 100     | 63  | 136 |
|                     |                        | Seedling   | 18       | 6       | 4   | 7   | 3       | 2   | 4   | 26        | 20  | 60  | 6       | 6   | 8   | 3       | 3   | 4   |

**Supplementary Table S3** Analysis of similarities (ANOSIM) results of the fungal endophyte communities for tree developmental stages (seedling, adult) and host species for both culture-dependent and culture-independent methods using Bray-Curtis distance for quantitative (abundance) data. Each sampling location (Amazon Conservatory for Tropical Studies Biological Station [NAPO], Allpahuayo-Mishana National Reserve [ALPE], and Jenaro Herrera Research Center [JEHE]) was analyzed independently and pooled together (All locations). Significant test results ( $P < 0.005$ ) are in bold.

| Method              | Site                        | Host level          | ANOSIM |              |
|---------------------|-----------------------------|---------------------|--------|--------------|
|                     |                             |                     | R      | p            |
| Culture-dependent   | ALPE                        | Developmental stage | 0.752  | <b>0.001</b> |
|                     |                             | Tree Species        | 0.062  | 0.014        |
|                     | JEHE                        | Developmental stage | 0.780  | <b>0.001</b> |
|                     |                             | Tree Species        | 0.030  | 0.093        |
|                     | NAPO                        | Developmental stage | 0.761  | <b>0.001</b> |
|                     |                             | Tree Species        | 0.033  | 0.071        |
|                     | ALL locations               | Developmental stage | 0.729  | <b>0.001</b> |
|                     |                             | Tree species        | 0.017  | 0.093        |
| Culture-independent | NAPO<br>Incidence frequency | Developmental stage | 0.919  | <b>0.001</b> |
|                     |                             | Tree species        | 0.027  | 0.103        |
|                     | NAPO<br>Sequence Reads      | Developmental stage | 0.789  | <b>0.001</b> |
|                     |                             | Tree Species        | 0.026  | 0.114        |

**Supplementary Table S4** The rate of distance decay (DD) of the fungal endophyte communities for each tree host across and within sampling locations (Amazon Conservatory for Tropical Studies Biological Station [NAPO], Allpahuayo-Mishana National Reserve [ALPE], and Jenaro Herrera Research Center [JEHE]). P values ( $P < 0.005$ ) in bold indicate a significant increase in community dissimilarity with increasing geographic distance.

| Location      | Developmental stage | Tree species               | Geographic distance range (km) | Slope Intercept | Rate of DD | P value      |
|---------------|---------------------|----------------------------|--------------------------------|-----------------|------------|--------------|
| ALPE          | Adult tree          | <i>Hevea guianensis</i>    | 0.00 - 2.54                    | 0.978           | -0.042     | 0.129        |
|               |                     | <i>Hevea pauciflora</i>    | 0.00 - 2.53                    | 0.947           | -0.009     | 0.25         |
|               |                     | <i>Micrandra elata</i>     | 0.00 - 1.25                    | 0.95            | -0.001     | 0.965        |
|               |                     | <i>Micrandra spruceana</i> | 0.00 - 1.23                    | 1.015           | -0.078     | 0.017        |
|               | Seedling tree       | <i>Hevea guianensis</i>    | 0.00 - 2.54                    | 0.797           | -0.014     | 0.399        |
|               |                     | <i>Hevea pauciflora</i>    | 0.00 - 2.53                    | 0.786           | 0.013      | 0.208        |
|               |                     | <i>Micrandra elata</i>     | 0.00 - 1.25                    | 0.906           | -0.004     | 0.899        |
|               |                     | <i>Micrandra spruceana</i> | 0.00 - 1.23                    | 0.612           | 0.054      | 0.179        |
| NAPO          | Adult tree          | <i>Hevea guianensis</i>    | 0.00 - 3.24                    | 0.959           | -0.01      | 0.097        |
|               |                     | <i>Hevea nitida</i>        | 0.00 - 4.87                    | 0.946           | 0.003      | 0.699        |
|               |                     | <i>Micrandra spruceana</i> | 0.00 - 2.81                    | 0.984           | -0.002     | 0.563        |
|               | Seedling tree       | <i>Hevea guianensis</i>    | 0.00 - 3.24                    | 0.705           | -0.033     | 0.249        |
|               |                     | <i>Hevea nitida</i>        | 0.00 - 4.87                    | 0.681           | 0.06       | <b>0.001</b> |
|               |                     | <i>Micrandra spruceana</i> | 0.00 - 2.81                    | 0.612           | 0.001      | 0.952        |
| JEHE          | Adult tree          | <i>Hevea brasiliensis</i>  | 0.00 - 4.06                    | 0.989           | -0.034     | 0.01         |
|               |                     | <i>Hevea nitida</i>        | 0.00 - 4.02                    | 0.993           | -0.011     | 0.31         |
|               |                     | <i>Micrandra spruceana</i> | 0.00 - 3.76                    | 0.896           | 0.008      | 0.42         |
|               | Seedling tree       | <i>Hevea brasiliensis</i>  | 0.00 - 4.06                    | 0.9             | -0.004     | 0.563        |
|               |                     | <i>Hevea nitida</i>        | 0.00 - 4.02                    | 0.898           | 0.01       | 0.366        |
|               |                     | <i>Micrandra spruceana</i> | 0.00 - 3.76                    | 0.788           | -0.001     | 0.926        |
| All locations | Adult tree          | <i>Hevea guianensis</i>    | 0.00 - 97.65                   | 0.965           | -0.00054   | <b>0.001</b> |
|               |                     | <i>Hevea nitida</i>        | 0.00 - 200.3                   | 0.982           | -0.00017   | 0.078        |
|               |                     | <i>Micrandra spruceana</i> | 0.00 - 198.2                   | 0.973           | -0.00031   | <b>0.001</b> |
|               | Seedling tree       | <i>Hevea guianensis</i>    | 0.00 - 97.65                   | 0.758           | -0.00048   | 0.011        |
|               |                     | <i>Hevea nitida</i>        | 0.00 - 200.3                   | 0.914           | -0.00046   | <b>0.004</b> |
|               |                     | <i>Micrandra spruceana</i> | 0.00 - 198.2                   | 0.814           | -0.00134   | <b>0.001</b> |



**Supplementary Table S5** The number and percent of endophyte species overlap within and across developmental stages (seedling, adult), per tree species, method (culture-dependent and culture independent), and location (Amazon Conservatory for Tropical Studies Biological Station [NAPO], Allpahuayo-Mishana National Reserve [ALPE], and Jenaro Herrera Research Center [JEHE]). Percentages of shared endophytes were calculated with singletons included and excluded from the datasets.

| Site                     | Tree host dev. stage | Tree host species    | No. endophyte species | No. singletons | No. shared endo species within dev. stage | No. shared endo species across dev. stage | % endophyte overlap within dev. stages |                    | % endophyte overlap across dev. stages |                    |
|--------------------------|----------------------|----------------------|-----------------------|----------------|-------------------------------------------|-------------------------------------------|----------------------------------------|--------------------|----------------------------------------|--------------------|
|                          |                      |                      |                       |                |                                           |                                           | with singletons                        | without singletons | with singletons                        | without singletons |
| ALPE                     | Adult                | <i>H. guianensis</i> | 39                    | 16             | 21                                        | 4                                         | 54%                                    | 91%                | 10%                                    | 17%                |
|                          |                      | <i>H. pauciflora</i> | 44                    | 21             | 21                                        | 2                                         | 48%                                    | 91%                | 5%                                     | 9%                 |
|                          |                      | <i>M. elata</i>      | 53                    | 26             | 22                                        | 1                                         | 41%                                    | 79%                | 2%                                     | 4%                 |
|                          |                      | <i>M. spruceana</i>  | 32                    | 14             | 17                                        | 2                                         | 53%                                    | 94%                | 6%                                     | 12%                |
|                          | Seedling             | <i>H. guianensis</i> | 43                    | 14             | 25                                        | 4                                         | 58%                                    | 86%                | 9%                                     | 14%                |
|                          |                      | <i>H. pauciflora</i> | 39                    | 16             | 23                                        | 2                                         | 59%                                    | 100%               | 5%                                     | 9%                 |
|                          |                      | <i>M. elata</i>      | 23                    | 7              | 15                                        | 1                                         | 65%                                    | 94%                | 4%                                     | 6%                 |
|                          |                      | <i>M. spruceana</i>  | 19                    | 3              | 15                                        | 2                                         | 79%                                    | 94%                | 11%                                    | 13%                |
| JEHE                     | Adult                | <i>H.</i>            | 28                    | 12             | 12                                        | 3                                         | 43%                                    | 75%                | 11%                                    | 19%                |
|                          |                      | <i>H. nitida</i>     | 17                    | 8              | 8                                         | 2                                         | 47%                                    | 89%                | 12%                                    | 22%                |
|                          |                      | <i>M. spruceana</i>  | 39                    | 24             | 12                                        | 3                                         | 31%                                    | 80%                | 8%                                     | 20%                |
|                          | Seedling             | <i>H.</i>            | 57                    | 25             | 31                                        | 3                                         | 54%                                    | 97%                | 5%                                     | 9%                 |
|                          |                      | <i>H. nitida</i>     | 40                    | 12             | 25                                        | 2                                         | 63%                                    | 89%                | 5%                                     | 7%                 |
|                          |                      | <i>M. spruceana</i>  | 45                    | 9              | 28                                        | 3                                         | 62%                                    | 78%                | 7%                                     | 8%                 |
| NAPO                     | Adult                | <i>H. guianensis</i> | 90                    | 40             | 38                                        | 6                                         | 42%                                    | 76%                | 7%                                     | 12%                |
|                          |                      | <i>H. nitida</i>     | 43                    | 16             | 26                                        | 4                                         | 60%                                    | 96%                | 9%                                     | 15%                |
|                          |                      | <i>M. spruceana</i>  | 79                    | 47             | 27                                        | 3                                         | 34%                                    | 84%                | 4%                                     | 9%                 |
|                          | Seedling             | <i>H. guianensis</i> | 35                    | 11             | 15                                        | 6                                         | 43%                                    | 63%                | 17%                                    | 25%                |
|                          |                      | <i>H. nitida</i>     | 19                    | 7              | 11                                        | 4                                         | 58%                                    | 92%                | 21%                                    | 33%                |
|                          |                      | <i>M. spruceana</i>  | 18                    | 3              | 14                                        | 3                                         | 78%                                    | 93%                | 17%                                    | 20%                |
| NAPO Culture Independent | Adult                | <i>H. guianensis</i> | 317                   | 225            | 31                                        | 3                                         | 10%                                    | 34%                | 1%                                     | 3%                 |
|                          |                      | <i>H. nitida</i>     | 133                   | 108            | 20                                        | 3                                         | 15%                                    | 80%                | 9%                                     | 15%                |
|                          |                      | <i>M. spruceana</i>  | 122                   | 87             | 23                                        | 2                                         | 19%                                    | 66%                | 4%                                     | 9%                 |
|                          | Seedling             | <i>H. guianensis</i> | 72                    | 32             | 35                                        | 3                                         | 49%                                    | 88%                | 4%                                     | 8%                 |
|                          |                      | <i>H. nitida</i>     | 53                    | 33             | 20                                        | 3                                         | 38%                                    | 100%               | 21%                                    | 33%                |
|                          |                      | <i>M. spruceana</i>  | 562                   | 430            | 30                                        | 2                                         | 5%                                     | 23%                | 17%                                    | 20%                |

**Supplementary Table S6** The distribution of core species per location (Amazon Conservatory for Tropical Studies Biological Station [NAPO], Allpahuayo-Mishana National Reserve [ALPE], and Jenaro Herrera Research Center [JEHE]), separated by developmental stage, and tree species. Columns denote a core species and an “X” indicates that the endophyte species was identified as a core species within a particular location, dataset and tree host. Core species: *Annulohypoxyton* species 1 (Annul 1), *Colletotrichum* species 11 (Colle 11), *Diaporthe* species 1 (Diapo 1), *Diaporthe* species 14 (Diapo 14), *Diaporthe* species 19 (Diapo 19), *Diaporthe* species 4 (Diapo 4), *Diaporthe* species 5 (Diapo 5), *Diaporthe* species 7 (Diapo 7), *Diaporthe* species 8 (Diapo 8), *Diaporthe* species 9 (Diapo 9), *Neopestalotiopsis* species 3 (Neope 3), *Pezicula* species 1 (Pezic 1), *Trichoderma* species 11 (Trich 11), and *Trichoderma* species 21 (Trich 21).

| Site | Tree host species      | Adult tree endophyte core species |         |          |         |          | Seedling tree endophyte core species |         |          |         |         |         |          |         |         |
|------|------------------------|-----------------------------------|---------|----------|---------|----------|--------------------------------------|---------|----------|---------|---------|---------|----------|---------|---------|
|      |                        | Trich 21                          | Neope 3 | Diapo 19 | Annul 1 | Trich 11 | Diapo 4                              | Diapo 7 | Diapo 14 | Pezic 1 | Diapo 5 | Diapo 8 | Colle 11 | Diapo 1 | Diapo 9 |
| ALPE | <i>H. guianensis</i>   | x                                 | -       | -        | -       | -        | x                                    | x       | -        | -       | -       | -       | -        | -       | -       |
|      | <i>H. pauciflora</i>   | x                                 | -       | -        | -       | -        | x                                    | x       | -        | -       | -       | -       | -        | -       | -       |
|      | <i>M. elata</i>        | -                                 | x       | -        | -       | -        | x                                    | x       | x        | x       | -       | -       | -        | -       | -       |
|      | <i>M. spruceana</i>    | -                                 | -       | -        | -       | -        | -                                    | -       | -        | x       | -       | -       | -        | -       | -       |
| JEHE | <i>H. brasiliensis</i> | -                                 | -       | -        | -       | -        | -                                    | x       | -        | -       | -       | -       | -        | x       | -       |
|      | <i>H. nitida</i>       | -                                 | -       | -        | -       | -        | -                                    | -       | -        | -       | -       | -       | -        | x       | -       |
|      | <i>M. spruceana</i>    | -                                 | -       | -        | -       | x        | -                                    | -       | -        | -       | -       | -       | -        | x       | x       |
| NAPO | <i>H. guianensis</i>   | -                                 | -       | -        | x       | -        | x                                    | x       | -        | -       | x       | -       | -        | -       | -       |
|      | <i>H. nitida</i>       | -                                 | -       | -        | -       | -        | -                                    | x       | -        | -       | -       | -       | x        | -       | -       |
|      | <i>M. spruceana</i>    | -                                 | -       | -        | -       | -        | -                                    | x       | -        | -       | x       | x       | -        | -       | -       |

**Supplementary Table S7** Culture-independent method: Observed and estimated species richness (SR) and diversity (Shannon Hill numbers and Simpson Hill numbers), including upper (UCL) and lower (LCL) confidence intervals, of endophytes for Amazon Conservatory for Tropical Studies Biological Station [NAPO], tree species and tree developmental stage. Partially overlapping confidence levels do not guarantee non-significance (Chao et al. 2014).

| Site | Tree species         | Dev. stage | Observed |         |     |     |         |     |     | Estimated |      |      |         |     |      |         |     |     |
|------|----------------------|------------|----------|---------|-----|-----|---------|-----|-----|-----------|------|------|---------|-----|------|---------|-----|-----|
|      |                      |            | SR       | Shannon | LCL | UCL | Simpson | LCL | UCL | SR        | LCL  | UCL  | Shannon | LCL | UCL  | Simpson | LCL | UCL |
| NAPO | <i>H. guianensis</i> | Adult      | 318      | 221     | 199 | 242 | 134     | 112 | 156 | 844       | 674  | 1096 | 446     | 389 | 502  | 174     | 138 | 210 |
|      |                      | Seedling   | 72       | 45      | 39  | 50  | 32      | 27  | 36  | 104       | 85   | 148  | 57      | 49  | 64   | 36      | 32  | 43  |
|      | <i>H. nitida</i>     | Adult      | 133      | 105     | 88  | 122 | 76      | 56  | 96  | 660       | 399  | 1179 | 346     | 239 | 452  | 123     | 76  | 173 |
|      |                      | Seedling   | 53       | 37      | 31  | 43  | 27      | 21  | 34  | 161       | 91   | 361  | 66      | 45  | 87   | 35      | 27  | 45  |
|      | <i>M. spruceana</i>  | Adult      | 122      | 72      | 60  | 83  | 42      | 32  | 53  | 391       | 261  | 645  | 134     | 102 | 165  | 50      | 42  | 60  |
|      |                      | Seedling   | 562      | 385     | 351 | 418 | 222     | 192 | 252 | 2052      | 1649 | 2602 | 938     | 816 | 1061 | 289     | 234 | 344 |

**Supplementary Table S8** The distribution of core species recovered from tree hosts in Amazon Conservatory for Tropical Studies Biological Station (NAPO) using culture-independent method. HEGU: *Hevea guianensis*, HENI: *Hevea nitida* and MISP: *Micrandra spruceana*. Columns denote a core species and an “X” indicates that the endophyte species was identified as a core species within a particular location, dataset and tree host. Core species: *Acremonium* species 3 (Acre 3), Agaricales species 15.2 (Agar 15.2), Basidiomycota species 21 (Basta 21), *Beltrania* species 1 (Beltr 1), *Beltraniella* species 1 (Belta 1), *Beltraniella* species 5 (Bella 5), *Colletotrichum* species 1 (Colle 1), *Colletotrichum* species 2 (Colle 2), *Cyphellophora* species 1 (Cyphe 1), *Debaryomyces* species 1 (Debar 1), *Debaryomyces* species 6 (Deb 6), *Debaryomyces* species 16 (Debar 16), *Debaryomyces* species 18 (Debar 18), *Graphidaceae* species 2.2 (Grap 2.2), Hypocreales species 3 (Hyp 3), *Sarocladium* species 1 (Saro 1), *Tolypocladium* species 1 (Tolyp 1), *Tolypocladium* species 2 (Tolyp 2), Tricholomataceae 1.1 (Mycen 1.1), Tricholomataceae 1.3 (Mycen 1.3), Xylariales species 4.1 (Xylal 4.1), and *Xylodon* species 5 (Xlod 5).

| Tree species | Adult tree endophyte core species |       |        |        |        |        |        | Seedling tree endophyte core species |          |          |        |           |           |         |         |        |          |         |         |         |         |         |         |   |
|--------------|-----------------------------------|-------|--------|--------|--------|--------|--------|--------------------------------------|----------|----------|--------|-----------|-----------|---------|---------|--------|----------|---------|---------|---------|---------|---------|---------|---|
|              | Deb 6                             | Hyp 3 | Toly 2 | Saro 1 | Toly 1 | Acre 3 | Agar 1 | Debar 1                              | Debar 16 | Debar 18 | Grap 2 | Mycen 1.3 | Mycen 1.1 | Colle 1 | Colle 2 | Xlod 5 | Basta 21 | Bella 5 | Belta 1 | Beltr 1 | Cyphe 1 | Debar 6 | Xylal 4 |   |
| HEGU         | x                                 | x     | x      | x      | x      | -      | -      | x                                    | x        | x        | x      | x         | x         | x       | x       | x      | -        | -       | -       | -       | -       | -       | -       | - |
| HENI         | x                                 | x     | x      | x      | -      | -      | -      | x                                    | x        | x        | x      | x         | x         | -       | -       | -      | -        | -       | -       | -       | -       | -       | -       | - |
| MISP         | x                                 | x     | x      | x      | -      | x      | x      | x                                    | x        | x        | x      | x         | x         | -       | -       | -      | x        | x       | x       | x       | x       | x       | x       | x |

**Supplementary Table S9** The proportion of function guilds separated by developmental stage, method (culture-dependent and culture independent), and tree host species sampled from Amazon Conservatory for Tropical Studies Biological Station (NAPO).

| Developmental stage | Method              | Tree species         | Proportion of function guild |             |                |            |              |            |
|---------------------|---------------------|----------------------|------------------------------|-------------|----------------|------------|--------------|------------|
|                     |                     |                      | Entomopathogenic             | Fungicolous | Plant pathogen | Saprotroph | Undetermined | Wood decay |
| Adult               | Culture dependent   | <i>H. guianensis</i> | 7%                           | 36%         | 5%             | 34%        | 9%           | 8%         |
|                     |                     | <i>H. nitida</i>     | 9%                           | 19%         | 5%             | 34%        | 17%          | 16%        |
|                     |                     | <i>M. spruceana</i>  | 6%                           | 14%         | 11%            | 42%        | 13%          | 13%        |
|                     |                     | Site total           | 7%                           | 27%         | 7%             | 37%        | 12%          | 11%        |
|                     | Culture independent | <i>H. guianensis</i> | 19%                          | 12%         | 12%            | 38%        | 19%          | 1%         |
|                     |                     | <i>H. nitida</i>     | 19%                          | 10%         | 10%            | 48%        | 13%          | 1%         |
|                     |                     | <i>M. spruceana</i>  | 32%                          | 7%          | 6%             | 32%        | 21%          | 2%         |
|                     |                     | Site total           | 23%                          | 10%         | 10%            | 38%        | 18%          | 1%         |
| Seedling            | Culture dependent   | <i>H. guianensis</i> | 1%                           | 1%          | 79%            | 19%        | 0%           | 1%         |
|                     |                     | <i>H. nitida</i>     | 2%                           | 6%          | 77%            | 16%        | 0%           | 0%         |
|                     |                     | <i>M. spruceana</i>  | 0%                           | 3%          | 95%            | 2%         | 1%           | 0%         |
|                     |                     | Site total           | 1%                           | 2%          | 84%            | 12%        | 0.2%         | 0%         |
|                     | Culture independent | <i>H. guianensis</i> | 0%                           | 1%          | 26%            | 39%        | 32%          | 2%         |
|                     |                     | <i>H. nitida</i>     | 0%                           | 0%          | 18%            | 44%        | 34%          | 4%         |
|                     |                     | <i>M. spruceana</i>  | 1%                           | 1%          | 9%             | 39%        | 44%          | 6%         |
|                     |                     | Site total           | 0%                           | 1%          | 26%            | 39%        | 32%          | 2%         |

**Supplementary Figure S1** Diversity results from culture-dependent approach from trees distributed in Amazon Conservatory for Tropical Studies Biological Station (NAPO). Species accumulation and diversity curves for endophytes sampled from (a) seedling and (b) adult trees separated by host species (HEGU: *Hevea guianensis*, HENI: *Hevea nitida* and MISP: *Micrandra spruceana*). Metrics include richness (q=0), Shannon HN (q=1), Simpson's HN (q=2).

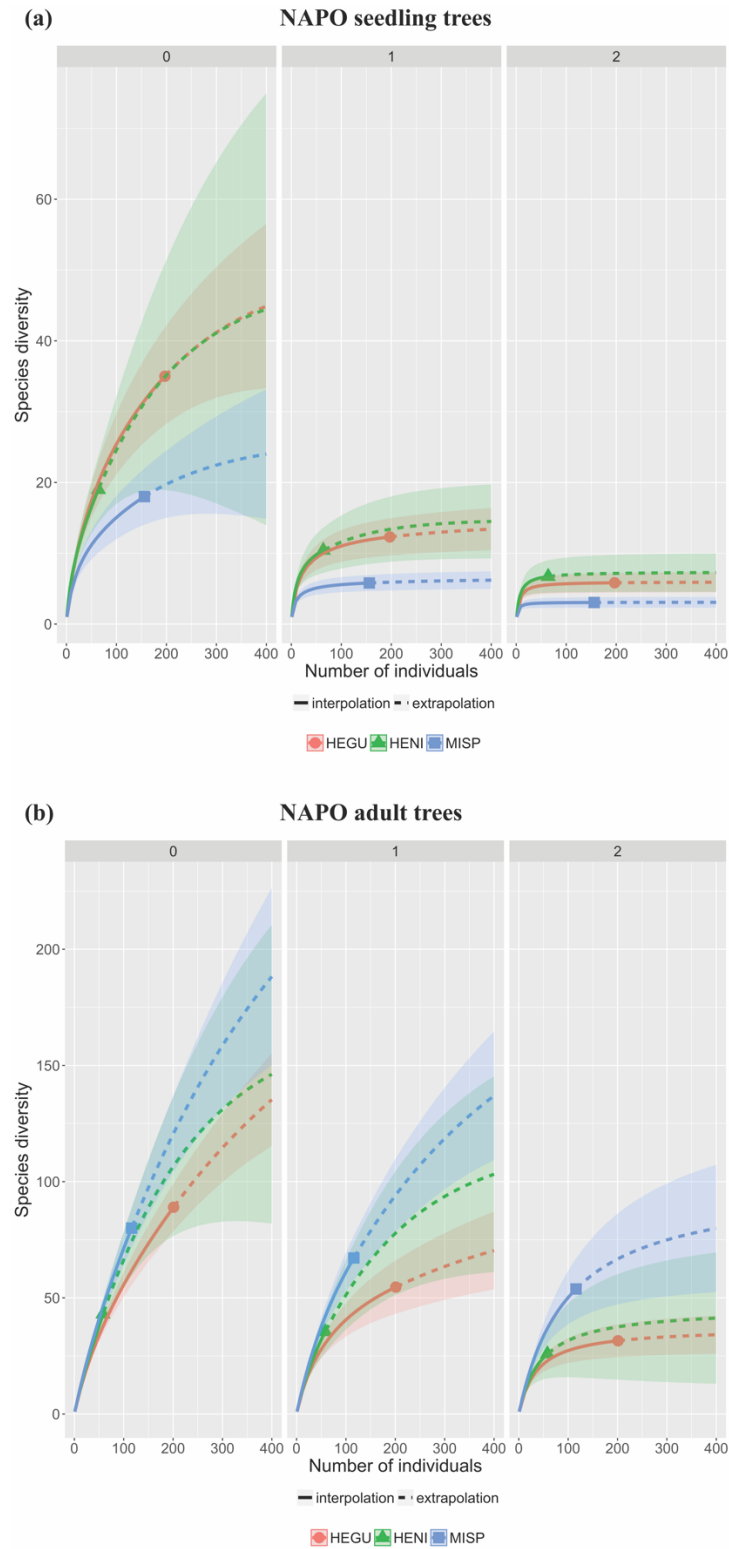

**Supplementary Figure S2** Diversity results from culture-dependent approach from trees distributed in Allpahuayo-Mishana National Reserve (ALPE). Species accumulation and diversity curves for endophytes sampled from (a) seedling and (b) adult trees separated by host species (HEGU: *Hevea guianensis*, HEPA: *Hevea pauciflora*, MIEL: *Micrandra elata* and MISP: *Micrandra spruceana*). Metrics include richness (q=0), Shannon HN (q=1), Simpson's HN (q=2).

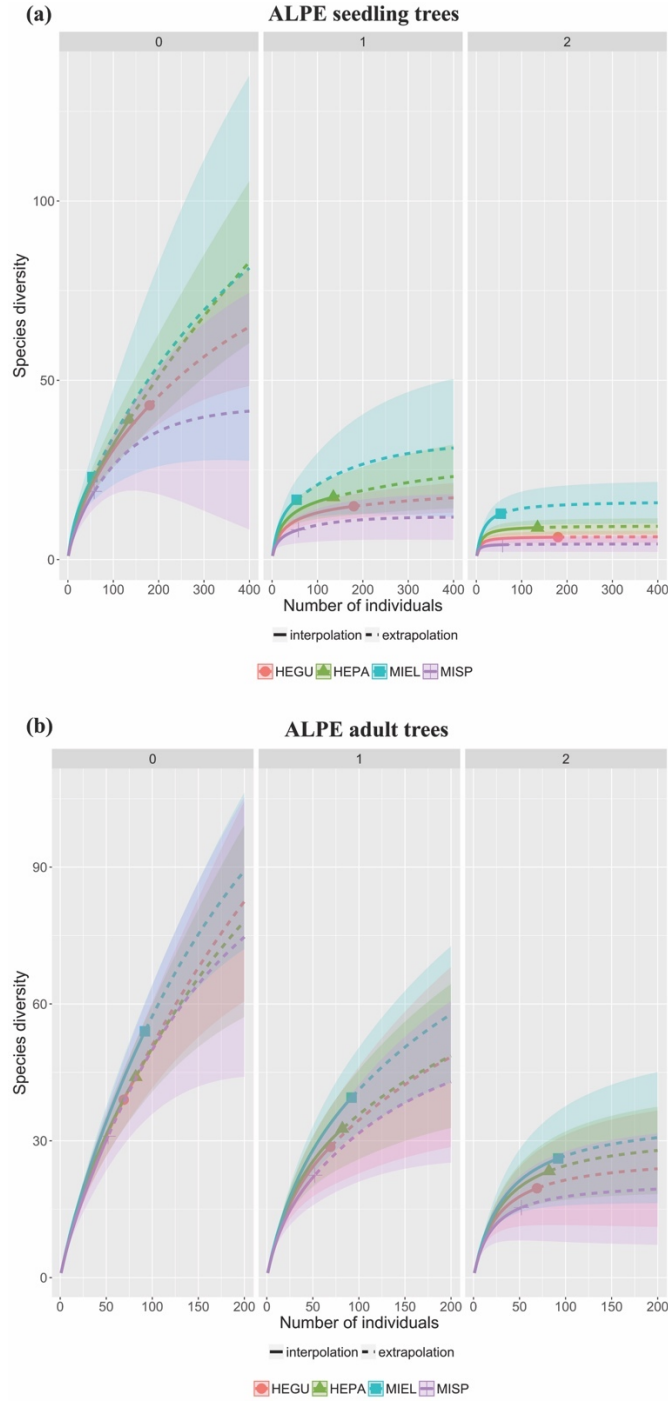

**Supplementary Figure S3** Diversity results from culture-dependent approach from trees distributed in Jenaro Herrera Research Center (JEHE). Species accumulation and diversity curves for endophytes sampled from (a) seedling and (b) adult trees separated by host species (HEBR: *Hevea brasiliensis*, HENI: *Hevea nitida* and MISP: *Micrandra spruceana*). Metrics include richness ( $q=0$ ), Shannon HN ( $q=1$ ), Simpson's HN ( $q=2$ ). Metrics include richness ( $q=0$ ), Shannon HN ( $q=1$ ), Simpson's HN ( $q=2$ ).

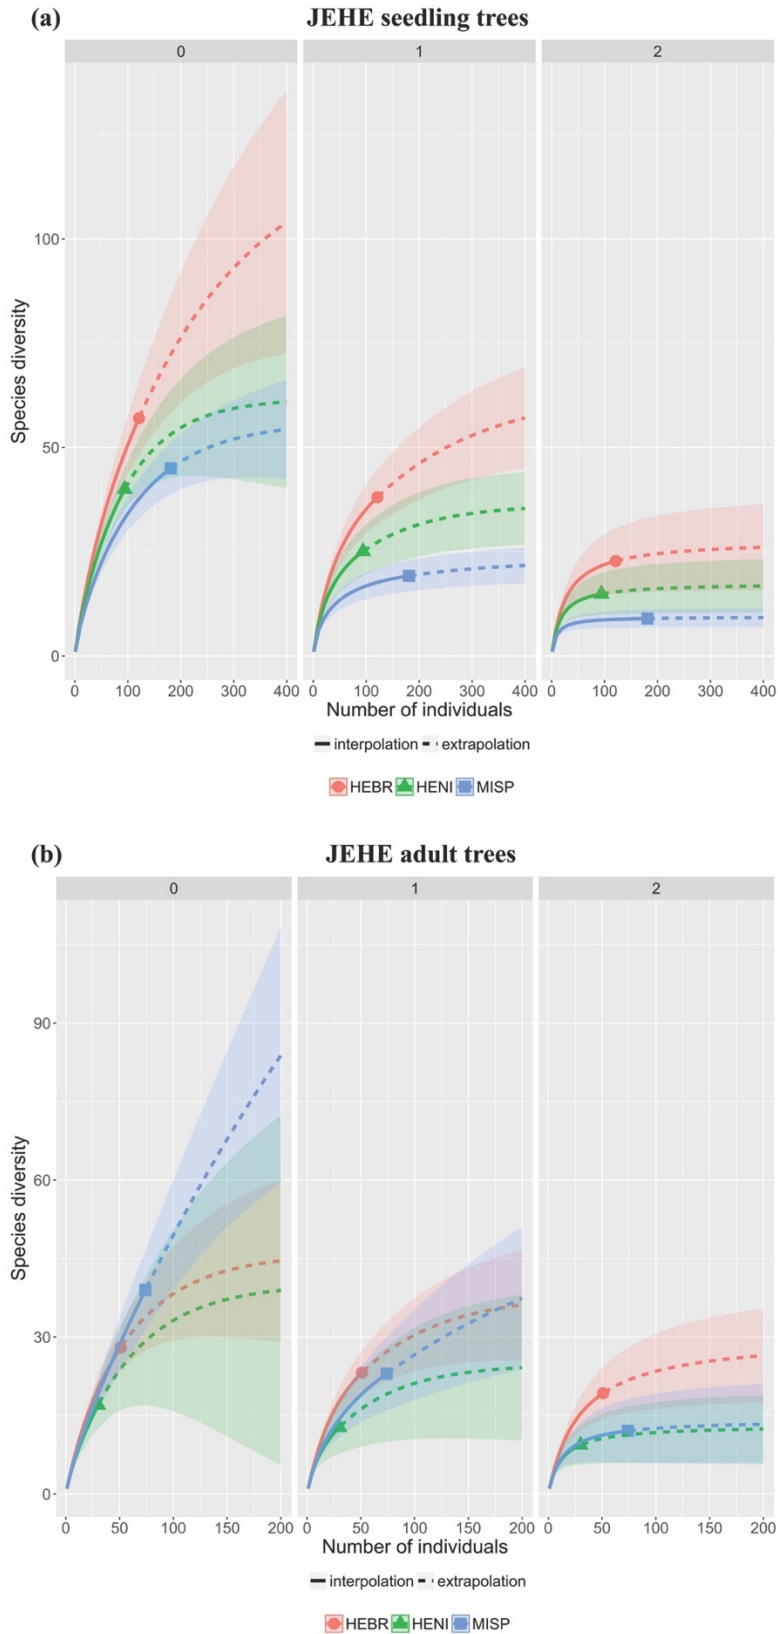



**Supplementary Figure S4** Culture-dependent approach. Nonmetric Multidimensional Scaling (NMDS) analyses using Bray-Curtis distance for quantitative (abundance) with stress values for all three locations and data partitioned by (a) developmental stage (Ad: Adult, Sd: Seedling), and (b) tree species (HEBR: *Hevea brasiliensis*, HEGU: *Hevea guianensis*, HENI: *Hevea nitida*, HEPA: *Hevea pauciflora*, MIEL: *Micrandra elata*, and MISP: *Micrandra spruceana*).

**(a) Developmental stage**

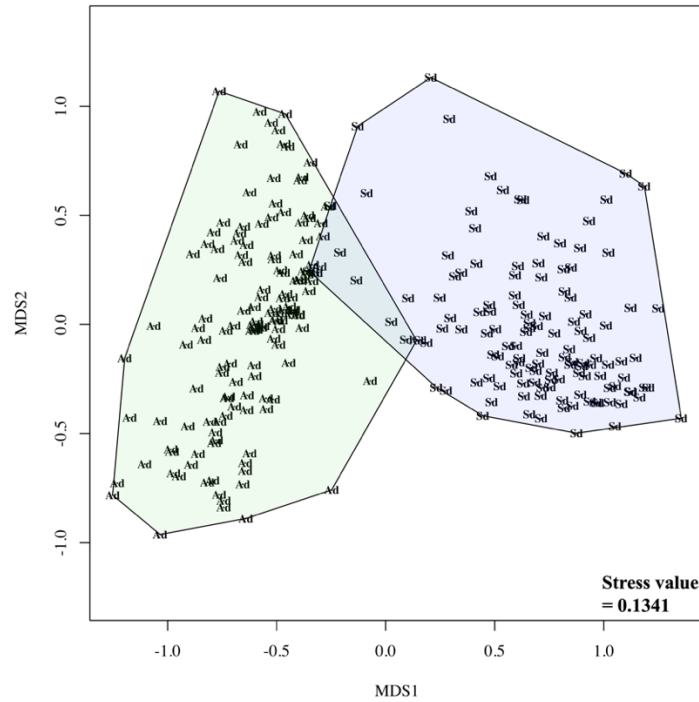

**(b) Host tree species**

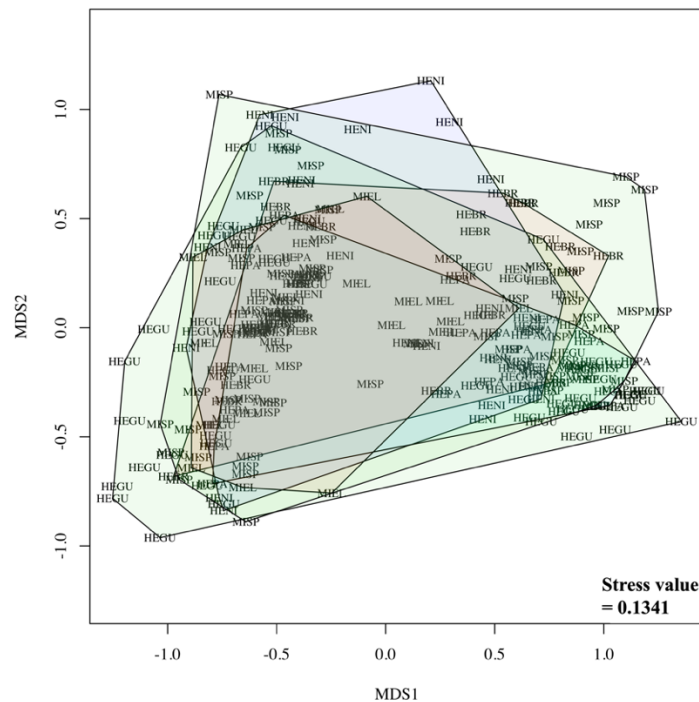

**Supplementary Figure S5** Culture-dependent approach. Nonmetric Multidimensional Scaling (NMDS) analyses using Bray-Curtis distance for quantitative (abundance) data with stress values. Data partitioned by developmental stage (Ad: Adult [green], Sd: Seedling [blue]) for each tree host species (a) HEBR: *Hevea brasiliensis*, (b) HEGU: *Hevea guianensis*, (c) HENI: *Hevea nitida*, (d) HEPA: *Hevea pauciflora*, (e) MIEL: *Micrandra elata*, and (f) MISP: *Micrandra spruceana*.

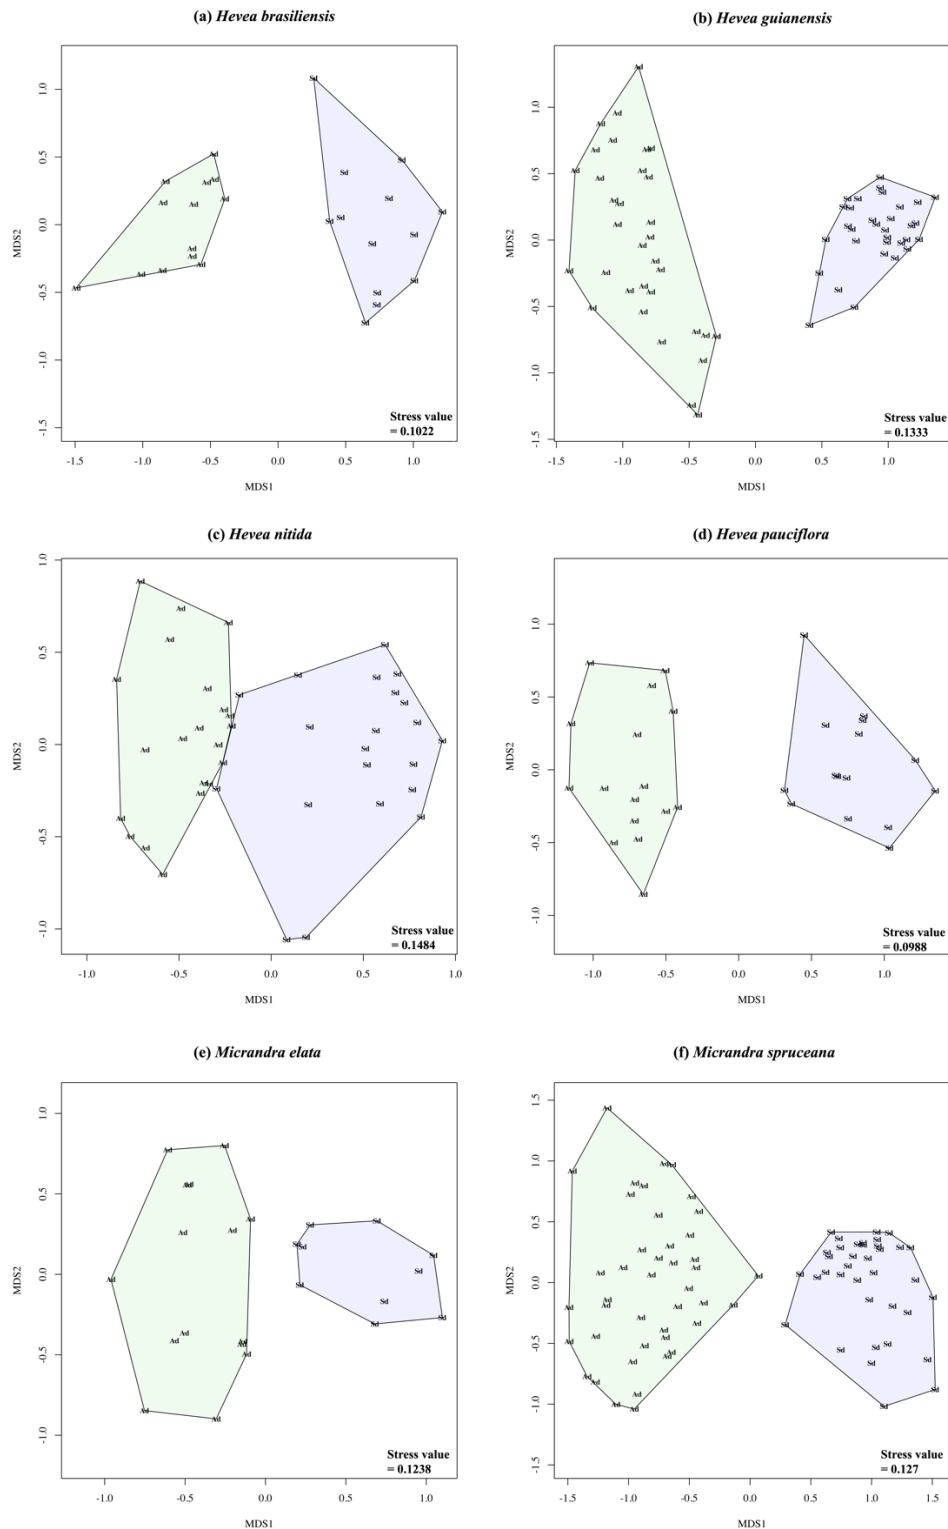

**Supplementary Figure S6** Venn diagrams showing the overlap of fungal species among adult tree communities (HEBR: *Hevea brasiliensis*, HEGU: *Hevea guianensis*, HENI: *Hevea nitida*, HEPA: *Hevea pauciflora*, MIEL: *Micrandra elata*, and MISP: *Micrandra spruceana*) per location (a) the Amazon Conservatory for Tropical Studies Biological Station (NAPO), (b) Allpahuayo-Mishana National Reserve (ALPE), and (c) Jenaro Herrera Research Center (JEHE).

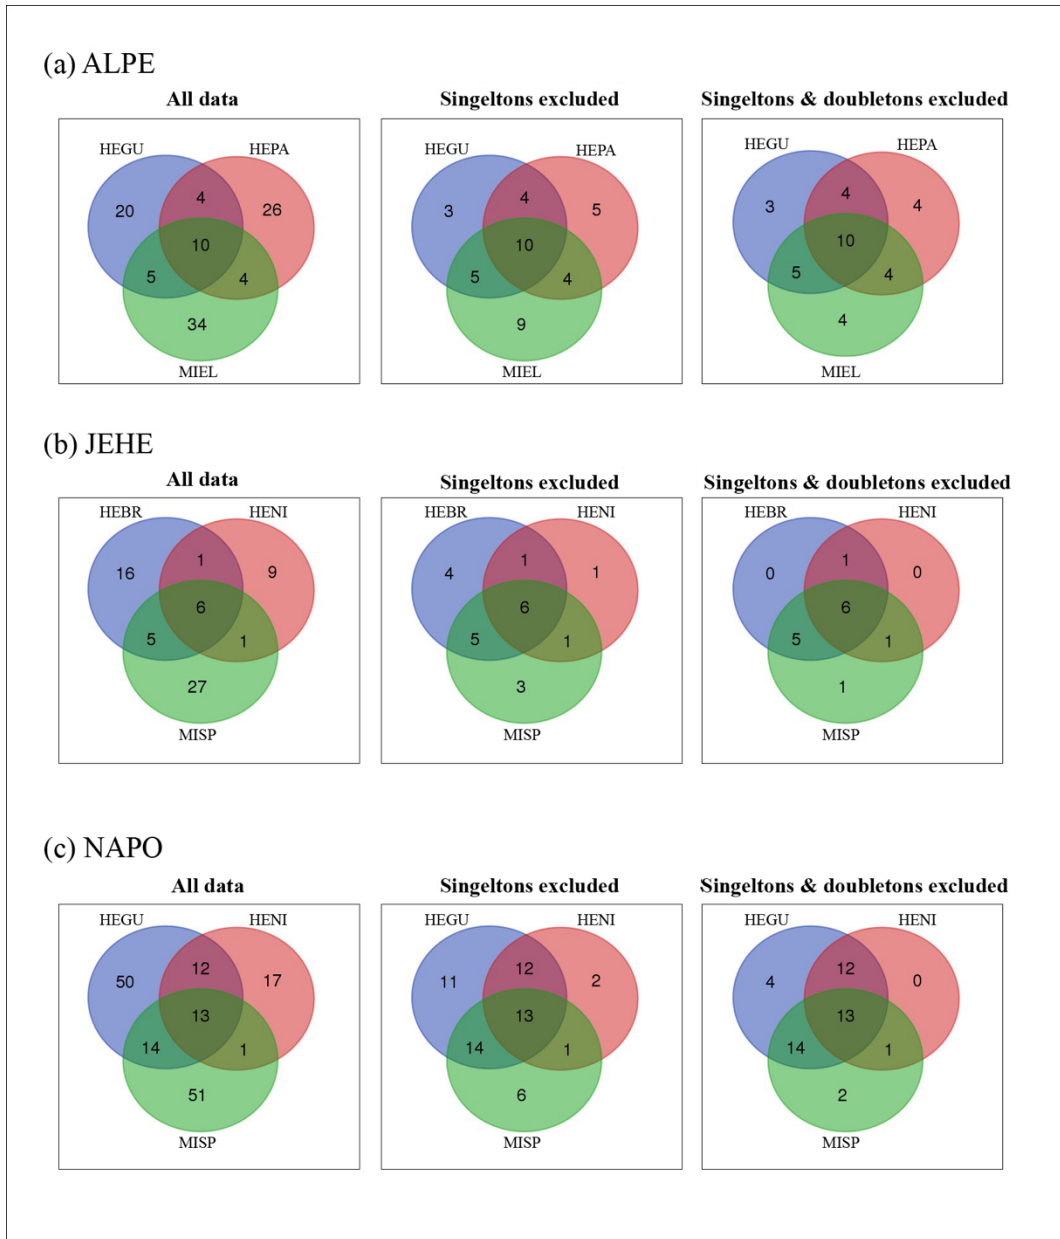

**Supplementary Figure S7** Diversity results from culture-independent approach. Species accumulation and diversity curves for endophytes sampled from seedling and adult trees separated by host species. Trees were sampled from the Amazon Conservatory for Tropical Studies Biological Station (NAPO). Metrics include richness ( $q=0$ ), Shannon HN ( $q=1$ ), Simpson's HN ( $q=2$ ).

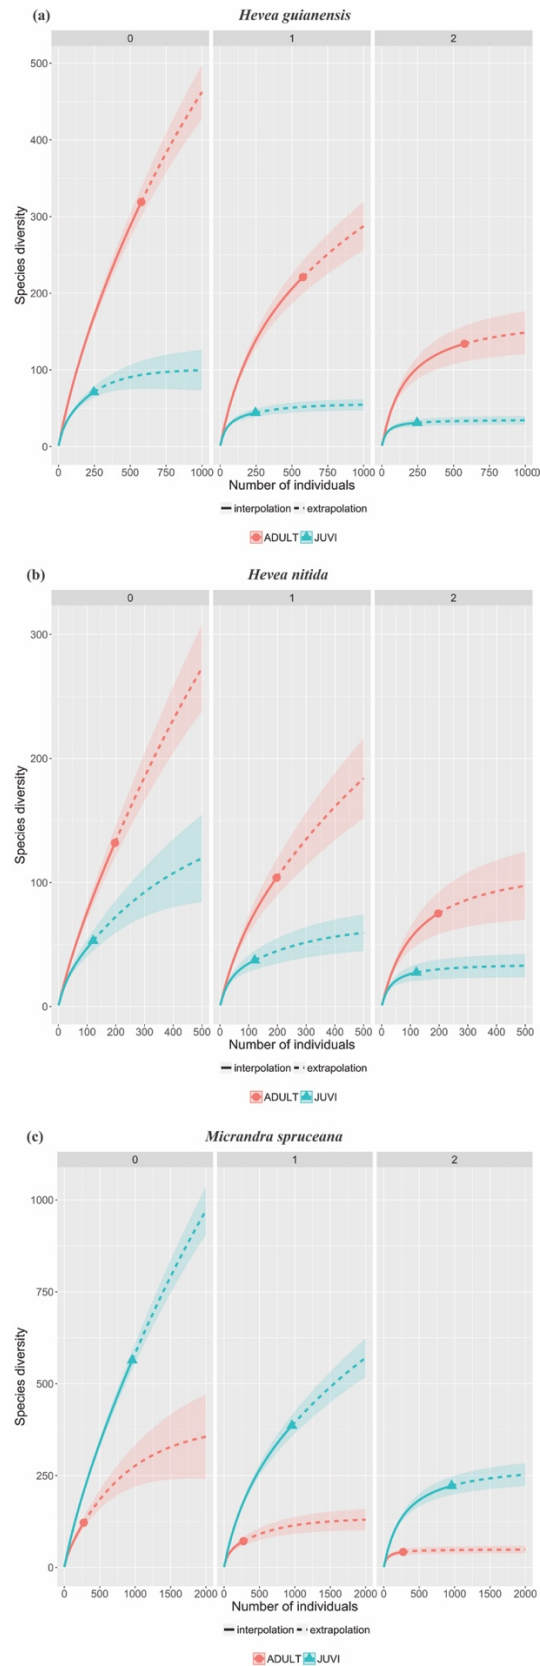

**Supplementary Figure S8** Culture-independent approach diversity results. Species accumulation and diversity curves for endophytes sampled from (a) seedling and (b) adult trees separated by host species (HEGU: *Hevea guianensis*, HENI: *Hevea nitida* and MISP: *Micrandra spruceana*). Trees were sampled from the Amazon Conservatory for Tropical Studies Biological Station (NAPO). Metrics include richness (q=0), Shannon HN (q=1), Simpson's HN (q=2).

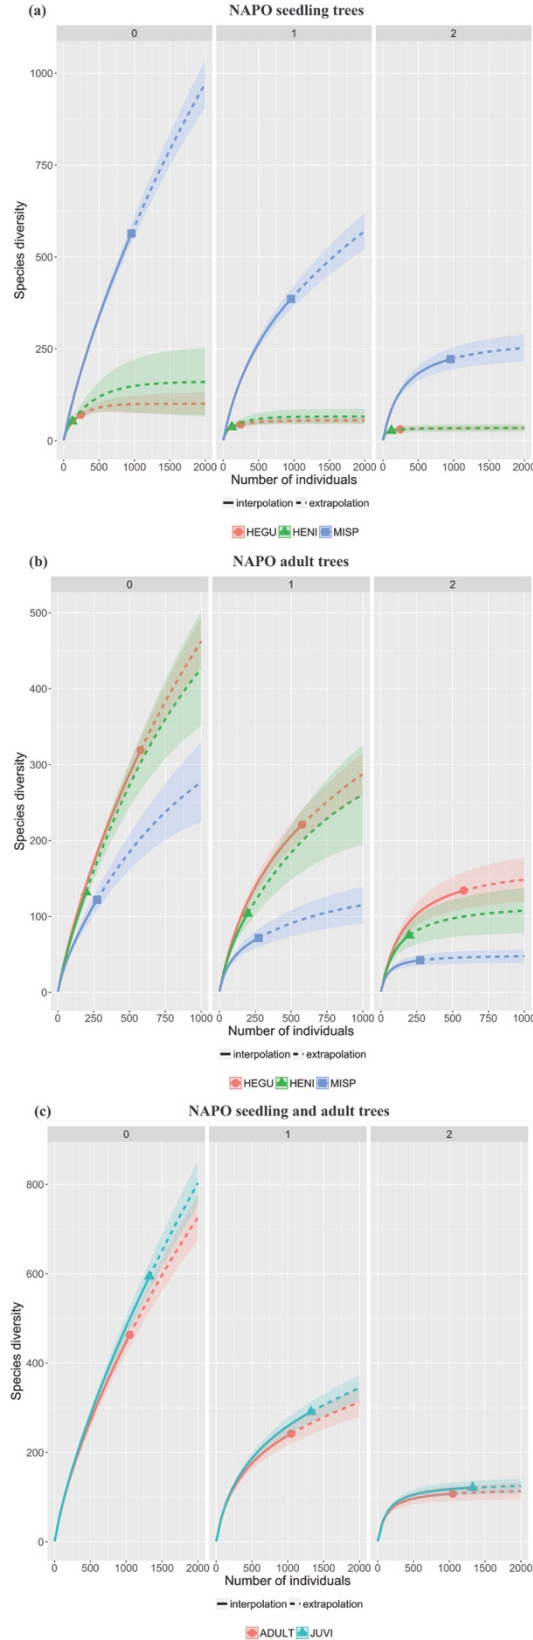

Supplement: 41598_2019_48943_MOESM1_ESM.pdf [file 41598_2019_48943_MOESM1_ESM.pdf]
